# Supplementary material for: Impact of Postdiagnosis Smoking on Long-term Survival of Cancer Patients: The Shanghai Cohort Study
Source: Oxford University Press journal article supplement (doi:10.1158/1055-9965.epi-13-0805-t), 2013-12-01
Supplement: 10559965epi130805t-sup-117903_1_supp_2175296_mndh5b.docx [file 10559965epi130805t-sup-117903_1_supp_2175296_mndh5b.docx]

| **Supplemental table 1. Characteristics for eligible cancer patients who were current smokers at diagnosis, by smoking status after cancer diagnosis, the Shanghai Cohort Study 1986-2010** | | | |
| --- | --- | --- | --- |
|  |  |  |  |
|  | **Quitters** | **Intermittent smokers** | **Continued smokers** |
| Pre-diagnosis smoking history | all patients were current smokers at diagnosis | | |
| Pre-diagnosis average pack-years smoked | 32.0 | 33.6 | 39.7 |
| Median age at diagnosis (Interquartile range) | 68.7 (7.9) | 65.7 (8.9) | 66.1 (10.9) |
| Treatment modalities, N (%) |  |  |  |
| No treatment | 13(6.1) | 35(10.4) | 45(22.8) |
| Surgery only | 62(29.0) | 95(28.3) | 48(24.4) |
| Radiation therapy only | 3(1.4) | 11(3.3) | 6(3.0) |
| Chemotherapy only | 14(6.5) | 23(6.8) | 21(10.7) |
| Surgery + Radiation therapy only | 3(1.4) | 4(1.2) | 3(1.5) |
| Surgery + Chemotherapy only | 67(31.3) | 54(16.1) | 24(12.2) |
| Radiation therapy + Chemotherapy only | 10(4.7) | 8(2.4) | 1(0.5) |
| Surgery + Radiation therapy + Chemotherapy | 9(4.2) | 58(17.3) | 33(16.8) |
| Unclassified | 33(15.4) | 48(14.3) | 16(8.1) |
| Total | 214 (100) | 336 (100) | 197 (100) |

| **Supplemental table 2. Characteristics for cancer patients who had eligible post-diagnosis information on smoking status, by smoking status before cancer diagnosis, the Shanghai Cohort Study 1986-2010** | | | | | | | |
| --- | --- | --- | --- | --- | --- | --- | --- |
|  |  |  |  |  |  |  |  |
|  | **All patients** | **Lung Cancer** | **Stomach Cancer** | **Colorectal Cancer** | **Bladder Cancer** | **Prostate Cancer** | **Other Cancers** |
| **Lifetime never smokers** |  |  |  |  |  |  |  |
| No. of cases | 340 | 29 | 88 | 45 | 22 | 40 | 116 |
| No. of deaths (%) | 170 (50.0) | 23 (79.3) | 36 (40.9) | 26 (57.8) | 5 (22.7) | 13 (32.5) | 67 (57.8) |
| Median age at diagnosis (Interquartile range) | 68.9(10.2) | 68.8(12.1) | 68.1(7.1) | 69.7(8.5) | 69.5(13.2) | 74.3(7.5) | 67.2(9.5) |
| Treatment modalities |  |  |  |  |  |  |  |
| No treatment | 28 | 6 | 3 | 2 | 0 | 0 | 17 |
| Surgery only | 127 | 7 | 26 | 14 | 10 | 25 | 45 |
| Radiation therapy only | 8 | 0 | 1 | 0 | 0 | 0 | 7 |
| Chemotherapy only | 29 | 6 | 2 | 2 | 2 | 2 | 15 |
| Surgery + Radiation therapy only | 6 | 0 | 0 | 2 | 0 | 1 | 3 |
| Surgery + Chemotherapy only | 64 | 2 | 29 | 16 | 7 | 5 | 5 |
| Radiation therapy + Chemotherapy only | 4 | 3 | 0 | 0 | 0 | 1 | 0 |
| Surgery + Radiation therapy + Chemotherapy | 36 | 3 | 12 | 8 | 0 | 2 | 11 |
| Unclassified | 38 | 2 | 15 | 1 | 3 | 4 | 13 |
| **Former smokers at cancer diagnosis** |  |  |  |  |  |  |  |
| No. of cases | 545 | 75 | 139 | 89 | 36 | 60 | 146 |
| No. of deaths (%) | 270 (49.5) | 55 (73.3) | 51 (36.7) | 53 (59.6) | 12 (33.3) | 19 (31.7) | 80 (54.8) |
| Median age at diagnosis (Interquartile range) | 71.8(9.1) | 70.1(9.8) | 71.3(8.4) | 70.4(8.2) | 71.2(8.4) | 75.3(8.0) | 72.3(9.3) |
| Average pack-years smoked | 19.3 | 29.7 | 16.7 | 20.8 | 19.0 | 18.6 | 15.8 |
| Treatment modalities |  |  |  |  |  |  |  |
| No treatment | 48 | 14 | 5 | 7 | 3 | 7 | 12 |
| Surgery only | 182 | 13 | 40 | 21 | 13 | 37 | 58 |
| Radiation therapy only | 21 | 5 | 1 | 1 | 1 | 1 | 12 |
| Chemotherapy only | 35 | 11 | 3 | 2 | 1 | 1 | 17 |
| Surgery + Radiation therapy only | 19 | 1 | 1 | 1 | 2 | 4 | 10 |
| Surgery + Chemotherapy only | 148 | 13 | 65 | 38 | 11 | 5 | 16 |
| Radiation therapy + Chemotherapy only | 9 | 6 | 0 | 0 | 0 | 0 | 3 |
| Surgery + Radiation therapy + Chemotherapy | 27 | 7 | 8 | 8 | 1 | 0 | 3 |
| Unclassified | 56 | 5 | 16 | 11 | 4 | 5 | 15 |
| **Current smokers at cancer diagnosis** |  |  |  |  |  |  |  |
| No. of cases | 747 | 184 | 135 | 114 | 49 | 32 | 233 |
| No. of deaths (%) | 491 (65.7) | 151 (82.1) | 72 (53.3) | 73 (64.0) | 23 (46.9) | 15 (46.9) | 157 (67.4) |
| Median age at diagnosis (Interquartile range) | 66.8(9.7) | 67.1(9.1) | 69.3(10.6) | 65.3(11.0) | 66.9(6.5) | 70.2(7.7) | 65.6(9.6) |
| Average pack-years smoked | 34.8 | 42.3 | 32.6 | 30.8 | 34.9 | 32.6 | 32.2 |
| Treatment modalities |  |  |  |  |  |  |  |
| No treatment | 93 | 31 | 8 | 14 | 3 | 2 | 35 |
| Surgery only | 205 | 36 | 40 | 32 | 12 | 15 | 70 |
| Radiation therapy only | 20 | 5 | 0 | 0 | 0 | 0 | 15 |
| Chemotherapy only | 58 | 35 | 1 | 2 | 1 | 0 | 19 |
| Surgery + Radiation therapy only | 10 | 2 | 0 | 0 | 1 | 3 | 4 |
| Surgery + Chemotherapy only | 145 | 23 | 44 | 29 | 18 | 4 | 27 |
| Radiation therapy + Chemotherapy only | 19 | 13 | 0 | 0 | 0 | 0 | 6 |
| Surgery + Radiation therapy + Chemotherapy | 100 | 23 | 25 | 22 | 7 | 2 | 21 |
| Unclassified | 97 | 16 | 17 | 15 | 7 | 6 | 36 |
